# Supplementary material for: Heat-Induced Oxidative Stress and Use of Astaxanthin on the NF-kB, NFE2L2 Transcription Factors and Cytoprotective Capacity in the Thymus of Broilers
Source: Preprints.org preprint supplement (doi:10.20944/preprints202406.0313.v1), 2024-06-05
Supplement: Supplementary file 1 [file supplementary]

*Animal Nutrition_*Thymus_manuscript_Appendix

Appendix A

| **Table A1.** Common components of *Haematococcus* algae (Lorenz; Cyanotech 1999). | | | |
| --- | --- | --- | --- |
|  | Minimum | Maximum | Mean |
| Protein | 17.30 | 27.16 | 23.62 |
| Carbohydrates | 36.9 | 40.0 | 38.0 |
| Fat | 7.14 | 21.22 | 13.80 |
| Iron (%) | 0.14 | 1.0 | 0.73 |
| Moisture | 3.0 | 9.0 | 6.0 |
| Magnesium (%) | 0.85 | 1.4 | 1.14 |
| Calcium (%) | 0.93 | 3.3 | 1.58 |
| Biotin (mg/lb) | 0.108 | 0.665 | 0.337 |
| L-carnitine (ug/g) | 7.0 | 12 | 7.5 |
| Folic acid (mg/100g) | 0.936 | 1.48 | 1.30 |
| Niacin (mg/lb) | 20.2 | 35.2 | 29.8 |
| Pantothenic acid (mg/lb) | 2.80 | 10.57 | 6.14 |
| Vitamin B1 (mg/lb) | <0.050 | 4.81 | 2.17 |
| Vitamin B2 (mg/lb) | 5.17 | 9.36 | 7.67 |
| Vitamin B6 (mg/lb) | 0.659 | 4.5 | 1.63 |
| Vitamin B12 (mg/lb) | 0.381 | 0.912 | 0.549 |
| Vitamin C (mg/lb) | 6.42 | 82.7 | 38.86 |
| Vitamin E (IU/lb) | 58.4 | 333 | 186.1 |
| Ash | 11.07 | 24.47 | 17.71 |
